# Supplementary material for: Design of yield-stress fluids: a rheology-to-structure inverse problem
Source: Royal Society of Chemistry journal article supplement (doi:10.1039/c7sm00758b), 2017-01-01
Supplement: c7sm00758b1.pdf [file c7sm00758b1.pdf]

## **Supplementary Information**

### **Design of yield-stress fluids:**

#### **A rheology-to-structure inverse problem**

Arif Z. Nelson, Randy H. Ewoldt\*

Department of Mechanical Science and Engineering,  
University of Illinois at Urbana-Champaign, Urbana, IL 61801, USA

#### **SI. Information flow for design versus analysis**

This section provides more background discussion on perspectives of materials design versus analysis. Both analysis and design require an understanding of the physics (and often chemistry) of the candidate materials but result in different organizations of information. Design evokes a rheology-to-structure organization (Figure S1A), in which a particular property (e.g. yield stress) is a shared feature and all possible microstructures are considered. Importantly, in this inverse problem, not all microstructures achieve the relevant behavior; particulate gels, emulsions, electrorheological fluids, etc. are all materials capable of displaying apparent yield stress behavior, but dilute emulsions, entangled polymer solutions, and many other materials have no yield stress. In contrast, the more common analysis approach evokes structure-to-rheology organization (Figure S1B), e.g. the seminal textbook of Larson [1]. Here the shared feature is a structure from which many possible rheological properties may arise.

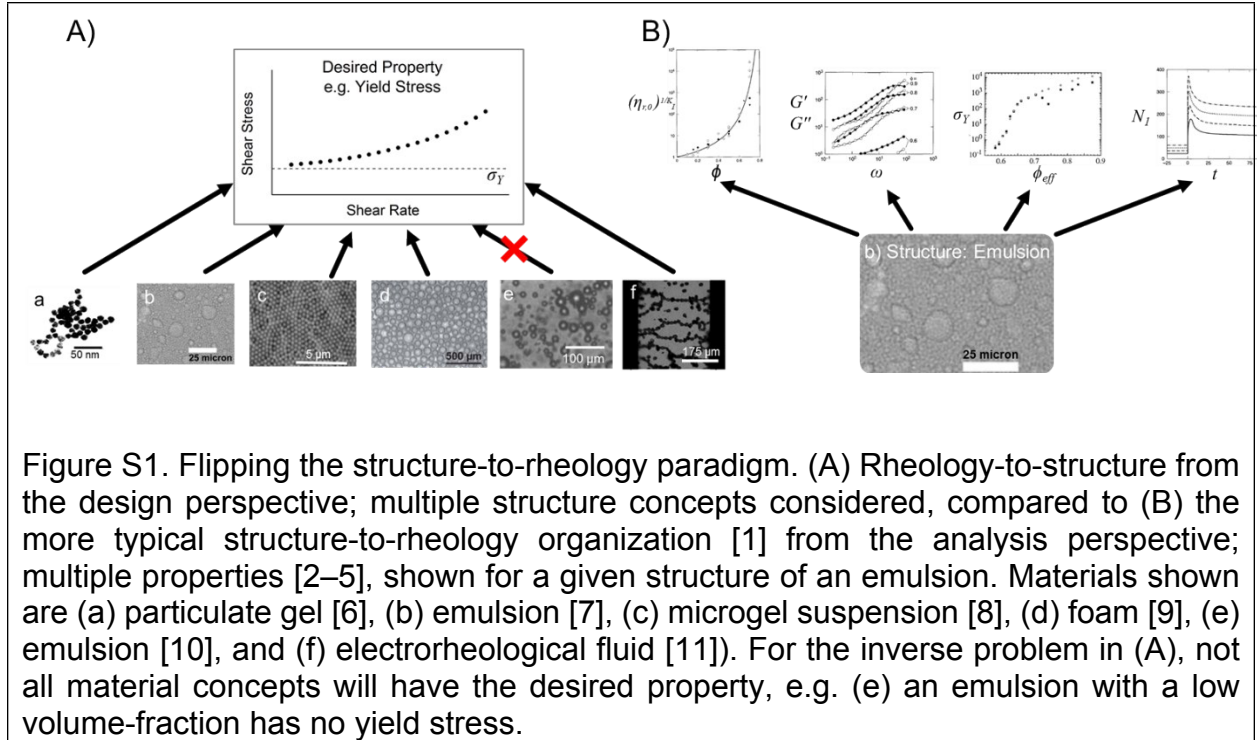

As we know, the analysis perspective is non-trivial for rheologically-complex materials; the characterization of properties can be especially arduous due to their function-valued nature, and so several complicated structural and observational dependencies are used to describe a single material. For example, in Figure S1B, the single material class of emulsions has zero-shear relative viscosity,  $\eta_{r,0}$  ( $K_I$  is given by [2]) as a function of droplet volume fraction,  $\phi$ ;  $G'$ , storage modulus, and  $G''$ , loss modulus in Pascals as a function of frequency,  $\omega$ , in inverse seconds [3]; yield stress,  $\sigma_Y$ , in dynes/cm<sup>2</sup> as a function of effective volume fraction,  $\phi_{eff}$  [4]; and first normal stress difference,  $N_1$ , in Pascals, as a function of time in seconds [5].

## **SII. Supplemental Background**

### **A. Design Process Theory**

This section reviews basic (but foundational) concepts from design science and describes how we will map them onto the field of rheology for the first time. There is a multitude of models for design processes and while they can differ significantly, the concepts we discuss here are generic enough to have analogs in most of them, including the process outlined in Figure 1B [12,13].

A generic design process follows six phases [13]: planning, concept development, system-level design, detail design, testing and refinement, and production ramp-up. Often, the term “material design” is used for what we would call “material optimization”, (a narrow portion of the full design process), e.g. efforts to tailor a particular (already selected) microstructure to optimize properties. Some would call this premature optimization as it skips past the “concept development” phase. The optimization may either be by trial-and-error or with deterministic processing-structure and/or structure-property models [14]. Examples of this approach can be found for more traditional materials [15] and for rheologically-complex materials [16]. Others use the term “material design” to only refer to the process of formulating new materials. This point-of-view also completely skips the concept development phase, ignoring the design strategy of selecting a pre-existing material to satisfy functional requirements and not acknowledging the difficult process of ideating new and potentially ground-breaking material concepts to satisfy one’s functional requirements.

This work makes contributions to the concept development phase. While the downstream optimization and detail design phases are necessary, they are premature

without first considering multiple concepts. To set the stage for concept development, the functional requirements and target specifications must first be described as part of the planning phase. Then, a set of numerous possible concepts are obtained through surveying existing materials, and through various brainstorming and ideation strategies. This set of concepts is then subjected to selection, formulation, and testing [13]. In this work, multiple material structure concepts are considered as ways to achieve a particular rheological behavior, that of a yield-stress fluid.

A fundamental aspect of the design process is describing a desired performance, i.e. the *functional requirements*, without specifying any particular solution [13,17,18]. This is non-trivial, and is accomplished by abstracting a problem to what is essential and general [19]. An over-specified requirement places creativity-stifling restrictions on concept generation, leading to design fixation and less innovative technologies (or materials) [20]. Good functional requirements also cannot be too broad, in order to provide physical insight into possible solutions and accurately frame the product's purpose [19]. For the design of a yield-stress fluid, a poor functional requirement might be, “a polymeric network that flows under stress and reversibly solidifies at low stress”. This mock-functional requirement is overly specific since it describes a particular material design choice: *polymers in a network*.

Once functional requirements are established, generation of product concepts can occur. Methodologies for the concept generation process generally build on approaches from lateral thinking [21], categorized as either surveying existing concepts or creating new concepts.

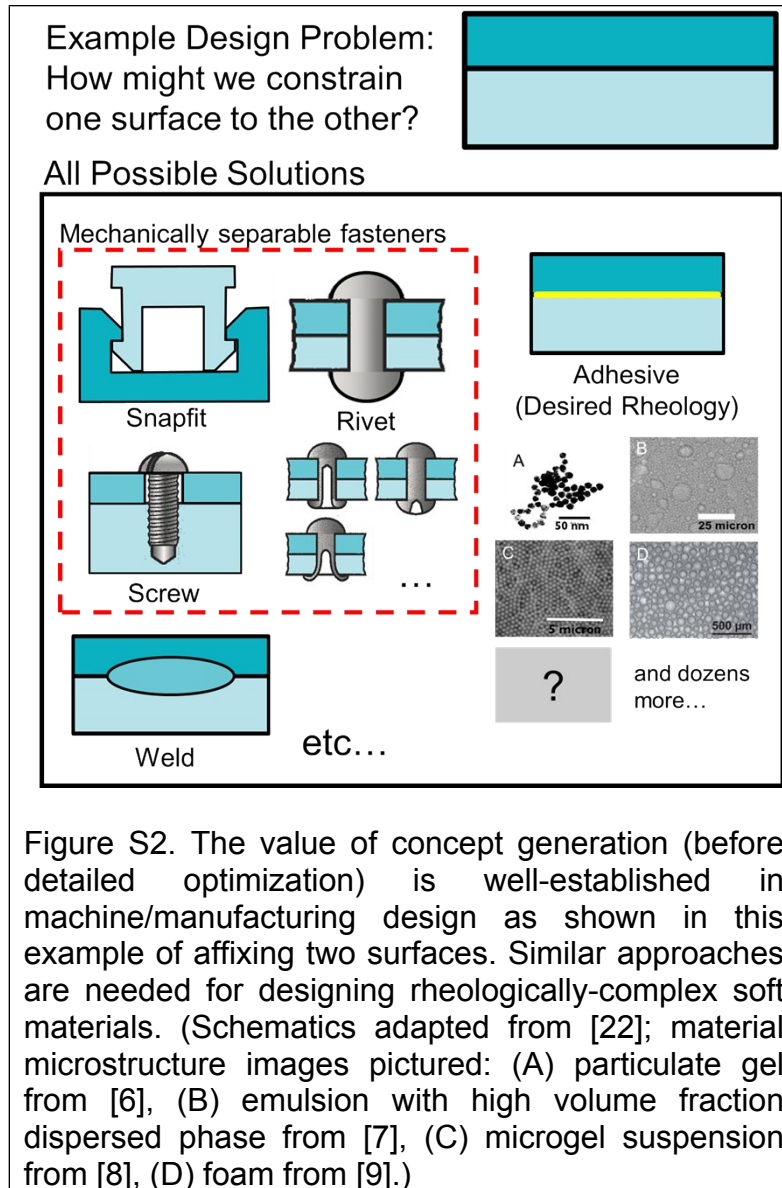

Figure S2. The value of concept generation (before detailed optimization) is well-established in machine/manufacturing design as shown in this example of affixing two surfaces. Similar approaches are needed for designing rheologically-complex soft materials. (Schematics adapted from [22]; material microstructure images pictured: (A) particulate gel from [6], (B) emulsion with high volume fraction dispersed phase from [7], (C) microgel suspension from [8], (D) foam from [9].)

## B. A brief example on the importance of creativity and design:

The field of Mechanical Design (Machine Design) is well established by textbooks and undergraduate curricula [23,24]. Here we describe an example from this area which, by analogy, helps frame a design paradigm for materials in which a functional requirement (planning phase) leads to creative brainstorming of multiple design strategies (concept generation).

Consider the functional requirement *to constrain one surface to another*. How many ways can you imagine achieving this? The most obvious approach might be to use a rivet or screw, while a slightly more creative strategy would be changing the surface topography to create a snapfit. Each strategy involves significant analysis and choices must be made to determine the detailed design (e.g. what rivet geometry supports the necessary stresses). However, even though there are seemingly endless varieties of mechanically separable fasteners one could choose from or newly create, only considering the approaches of “fasteners” is unnecessarily limiting.

We can increase the likelihood of obtaining the “best” solution (as determined by one’s functional requirements) by identifying *more* possible design ideas [25], as shown in Figure S2. Design strategies such as welding or an adhesive also satisfy the functional requirement. In the case of an adhesive, a material with a desired functionality/rheological property is introduced. This yields another layer to the methodologies for concept generation, choosing from dozens of existing materials or synthesizing new ones. Yield-stress fluids are, of course, one class of materials that can be used as an adhesive [26–28]. This presented adhesion scenario is developed and used in Section IV. as one demonstration of our proposed design paradigm.

Often the approaches to generate many concepts before down-selection are seen as a waste of time by those inexperienced in effective design, but there is great value. Even if the most obvious strategy or material turns out to be “best”, the generation of additional ideas allows one to effectively justify their design as clearly superior to all other considered concepts [21].

### **SIII. Materials and Methods**

Table S1 describes the specific material compositions presented in this paper; sample preparation steps are as follows. This section also details the experimental setup and model fitting protocol.

Aqueous suspensions of polymer microgel particles were prepared from Carbopol 940 obtained from Acros Organics. Powdered material was mixed with steam distilled water for thirty minutes before being neutralized to a pH of 7 using a sodium hydroxide solution, resulting in the swollen microgel particles that are jammed at sufficiently high concentrations [29].

Silicone oil-in-water emulsions were formulated with 1000 cSt (at 25 °C) silicone oil obtained from Sigma-Aldrich and deionized water; sodium dodecyl sulfate from Fisher Scientific was used as the emulsifier. The mixture was homogenized at 5000 rpm for 10 minutes using an IKA T-18 homogenizer with an S18N-19G dispersing element attachment. Mineral oil-in-water emulsions were synthesized by the same procedure using light mineral oil from Sigma Aldrich which has a viscosity between 14.2 and 17.0 cSt at 40 °C.

Bentonite from Sigma Aldrich was dispersed in steam distilled water using an overhead stirrer at approximately 300 rpm until mixed, at which point the clay particles form a percolated gel network [30]. The Laponite RD suspension, which also has particles that can attractively interact, was synthesized by the same procedure as the Bentonite suspensions with powder obtained from Conservation Support Systems. Bentonite and Laponite suspensions were allowed to stand quiescently for one week before testing to hydrate [31].

Xanthan gum from *Xanthomonas Campestris*, a polymer which is known to form structure in solution through self-associative intermolecular attractions [32], was obtained from Sigma-Aldrich. Solutions were formulated by slowly adding xanthan gum powder to deionized water being mixed with an overhead stirrer at between 300 and 600 rpm. Solutions were mixed for 5 minutes before being covered with tin foil and placed on a hotplate at 80 °C to mix at 400 rpm for an additional 30 minutes.

Table S1. Material formulations organized by material and weight-percentage of additive.

| Material                       | wt% Solid Content         |         |
|--------------------------------|---------------------------|---------|
| Carbopol                       | 0.1, 0.15, 0.2, 0.25, 0.5 |         |
| Bentonite                      | 7, 8, 9, 10, 11, 12       |         |
| Laponite                       | 3, 4, 5                   |         |
| Xanthan Gum                    | 2, 4, 5                   |         |
|                                | wt% Oil                   | wt% SDS |
| Silicone Oil-in-Water Emulsion | 65                        | 11.7    |
|                                | 70                        | 10      |
|                                | 75                        | 8.3     |
|                                | 80                        | 6.7     |
| Mineral Oil-in-Water Emulsion  | 65                        | 11.7    |
|                                | 75                        | 8.3     |

Rheological characterization of steady flow properties was performed on rotational rheometers (combined motor/transducer instruments, TA Instruments DHR-3 or AR-G2) using a parallel-plate geometry with a diameter of 40 millimeters. Depending on the sample, either a sandblasted plate or adhesive-backed silicon carbide sandpaper (600 grit or 60 grit) was used to prevent slip. Materials were tested at multiple gaps to verify



the absence of slip [33]. Parallel-plate corrections were used to identify the true shear stress. Apparent stress,  $\sigma_A$ , was fit to a polynomial curve and corrected to the stress at the rim using,

$$\sigma_{True} = \frac{\sigma_A}{4} \left[ 3 + \frac{d \ln \sigma_A}{d \ln \dot{\gamma}_{True}} \right], \quad (S1)$$

where  $\dot{\gamma}_{True}$  is the apparent applied shear rate at the rim [34]. Unless otherwise specified, all steady flow tests are performed from high-to-low shear rates, thus the yield stress is a dynamic yield stress rather than a static yield stress [30]. All materials except Bentonite and Laponite (see above), were tested within one week of formulation.

Shear flow measurements were fit to parameterized equations (Bingham and Herschel-Bulkley, details in Section III.D). For some materials, especially at smaller gaps, an increasing stress was observed as the shear rate was lowered, creating a non-monotonic flow curve [35]. In the case of these materials, the fitting was only done with the higher shear rate data lying between the highest and lowest values of corrected stress. When fitting the Bingham model, the yield-stress parameter was constrained to the lowest corrected stress value. All fitting was performed using OriginPro 9.0 software with variance weighting where the residual sum of squares, RSS, is calculated by,

$$\sum_{i=1}^n \left( \frac{\sigma_{Data,i} - \sigma_{Model}}{\sigma_{Data,i}} \right)^2. \quad (S2)$$

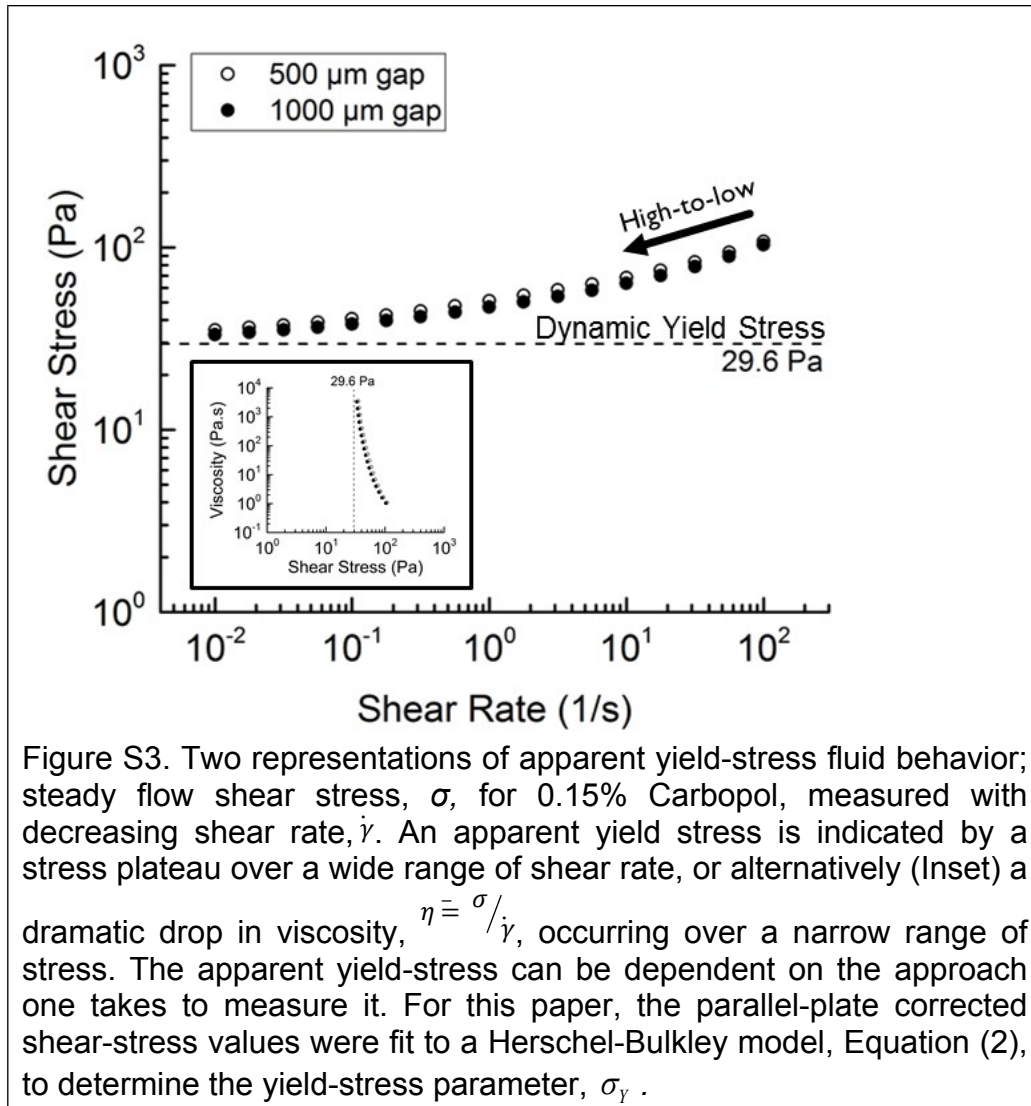

Figure S3 precisely depicts the single method we choose to characterize our materials, and shows two equivalent representations of apparent yield-stress fluid behavior based on steady shear flow characterization. A plateauing shear stress as shear rate decreases (Figure S3) and a dramatic drop in viscosity across a narrow range of shear stress (Figure S3 Inset), show the subjective nature of reporting a precise yield stress value.

## SIV. Experimental Results

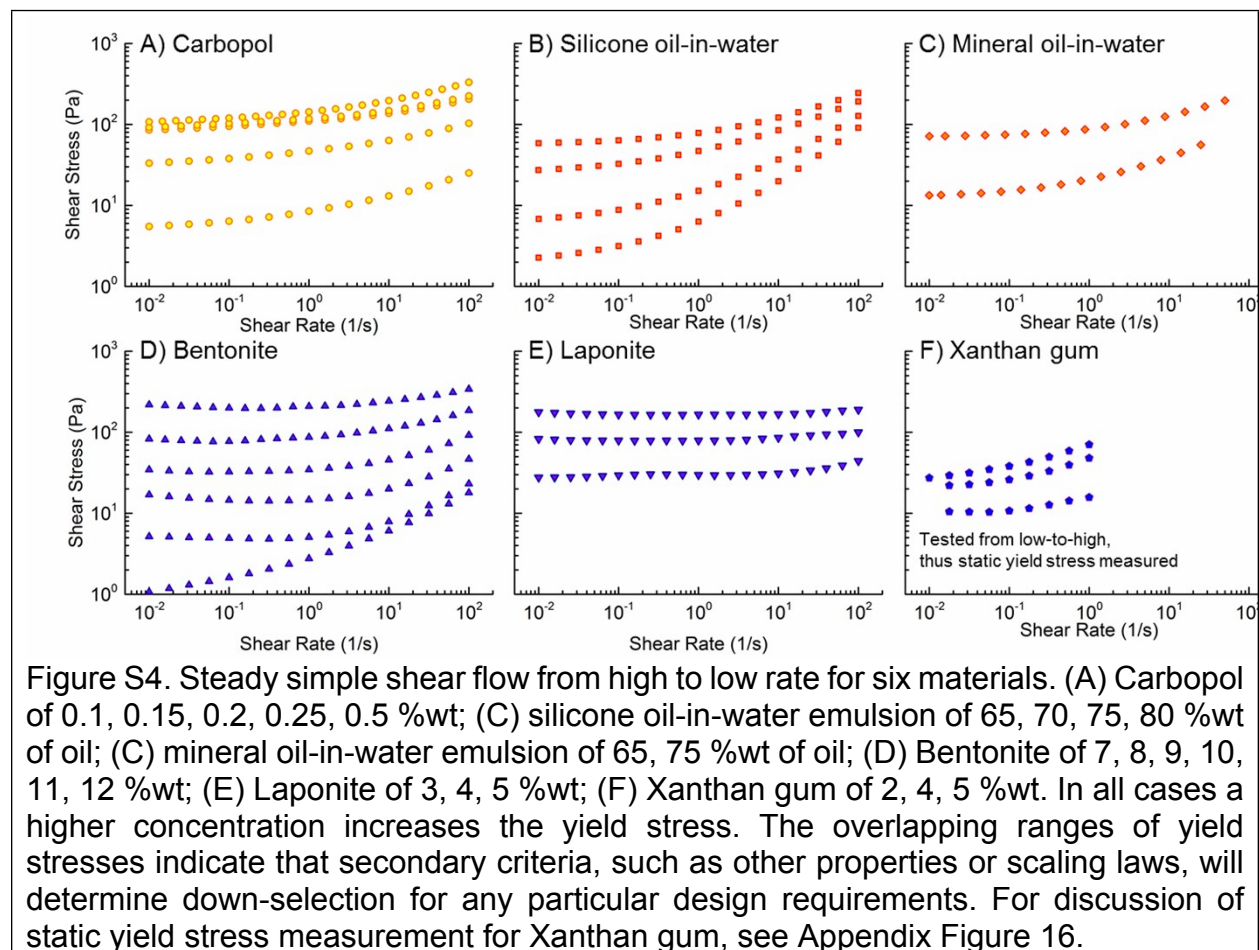

The experimental flow curves in Figure S4 (additional rheological data in Supplemental Information) are evidence that there are numerous ways to achieve the same yield stress, and therefore designing such materials is an inverse problem. Plateaus in shear stress at low shear rates indicate apparent yield stress behavior. All materials tested show an increasing yield stress with weight-percentage of additive. Although the chemistry and microstructure vary, the ranges of yield stress overlap.

Additional material properties can vary considerably (e.g. high-rate viscosity and critical shear rate). When engineering a yield-stress fluid, one must use such additional

(secondary) criteria to make rational design decisions. An example of varying secondary properties was considered in Emady [36], who found that for approximately the same yield stress value, materials of differing microstructure showed different particle sedimentation behavior. There is an uncountable number of secondary properties that may be relevant for yield-stress fluid applications. Here, we consider the most fundamental secondary property: the flow behavior after yield. This may be sufficient for some applications, as shown for robotic adhesive locomotion [37] and the understanding of droplet impact of yield stress fluids [38,39]. The experimental results here form a foundational paradigm for a database of yield-stress fluid properties. This database can be expanded through the later addition of more secondary properties. Full rheological results (uncorrected stresses, repeat experiments, multiple gaps) are provided in Section SVI.

## **SV. Comparison of high-dimensional data**

The reader may question how necessary low-dimensional descriptions are when selecting between different candidate materials. It is fairly uncomplicated to compare the full flow curves of a few materials and discern qualitative differences in yield stress and even high-rate viscosity. Co-plotted in Figure S5 are the full flow curves of the over twenty materials characterized in this work. Even for this limited database, it is not feasible to efficiently select or rank particular materials based on some performance target. Presented only with Figure S5, ranking materials based on critical shear-rate (as in Section IV. A) would be an outrageously cumbersome task.

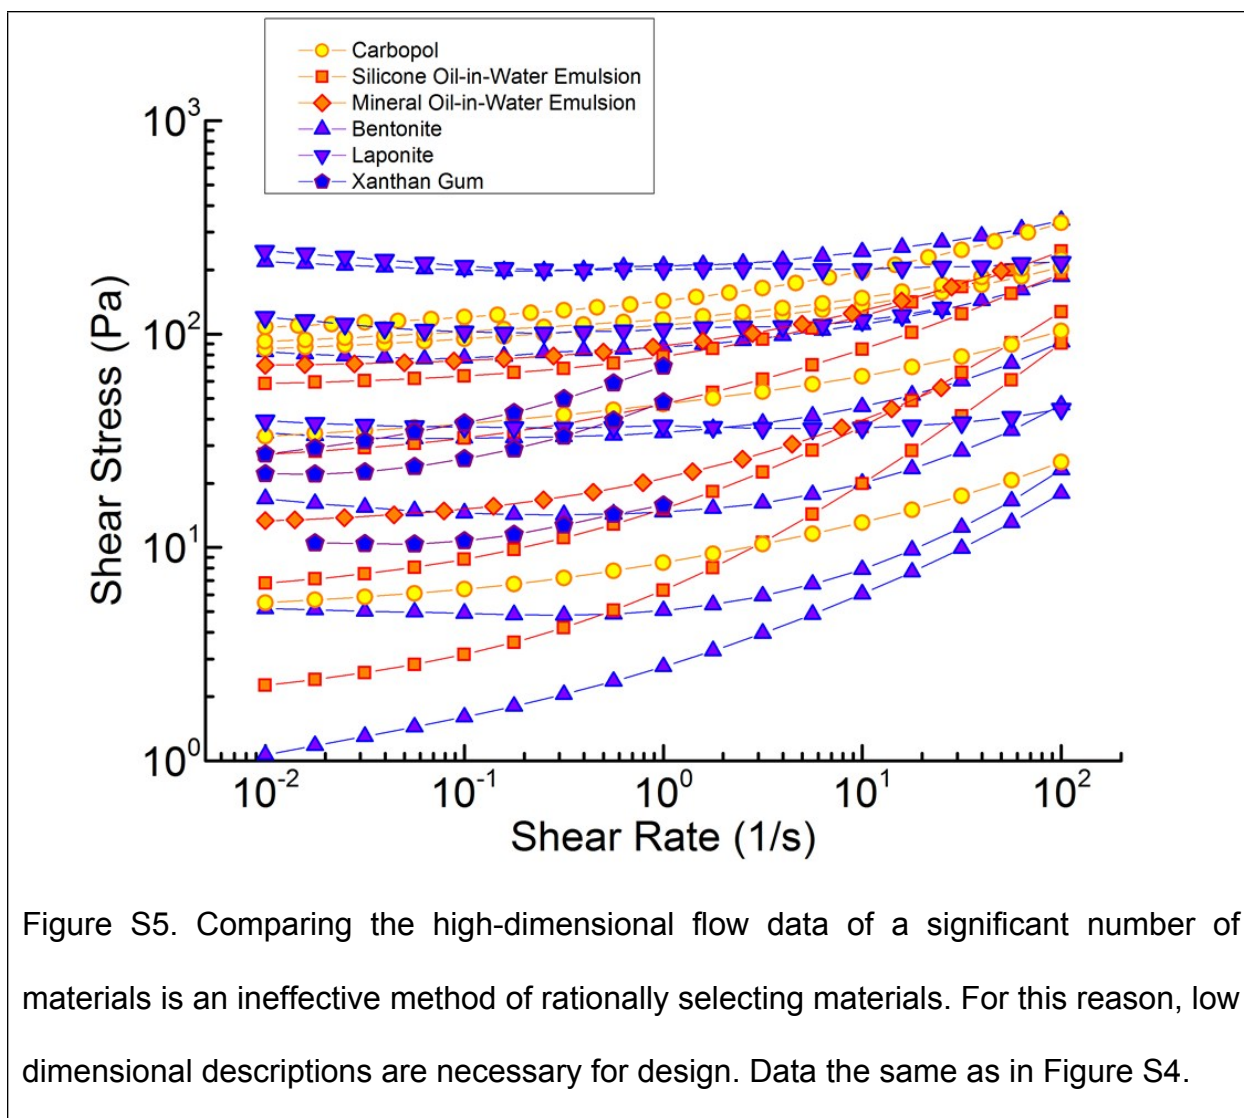

## SVI. Detailed Rheological Data

Figures S4 through S9 depict the repeated experiments for each material formulation with uncorrected values of stress (see Section II for formulation and correction specifics). For each formulation, a representative data set was corrected (see supplementary .csv file) and validated for lack of slip with an experiment performed at a smaller gap (500  $\mu\text{m}$ ). Comparisons of corrected data at the two tested gaps are shown in Figures S10 through 15. In the case of the emulsions, at a smaller gap, the measured stress can be

significantly higher; this can be attributed to a confinement effect, where the suspended droplets are more tightly packed at the smaller gap. In no cases is the measured stress at the small gap smaller than at the larger gap (outside of the experimental error from repeat experiments). Therefore, we have no evidence of slip occurring for any of the formulations shown.

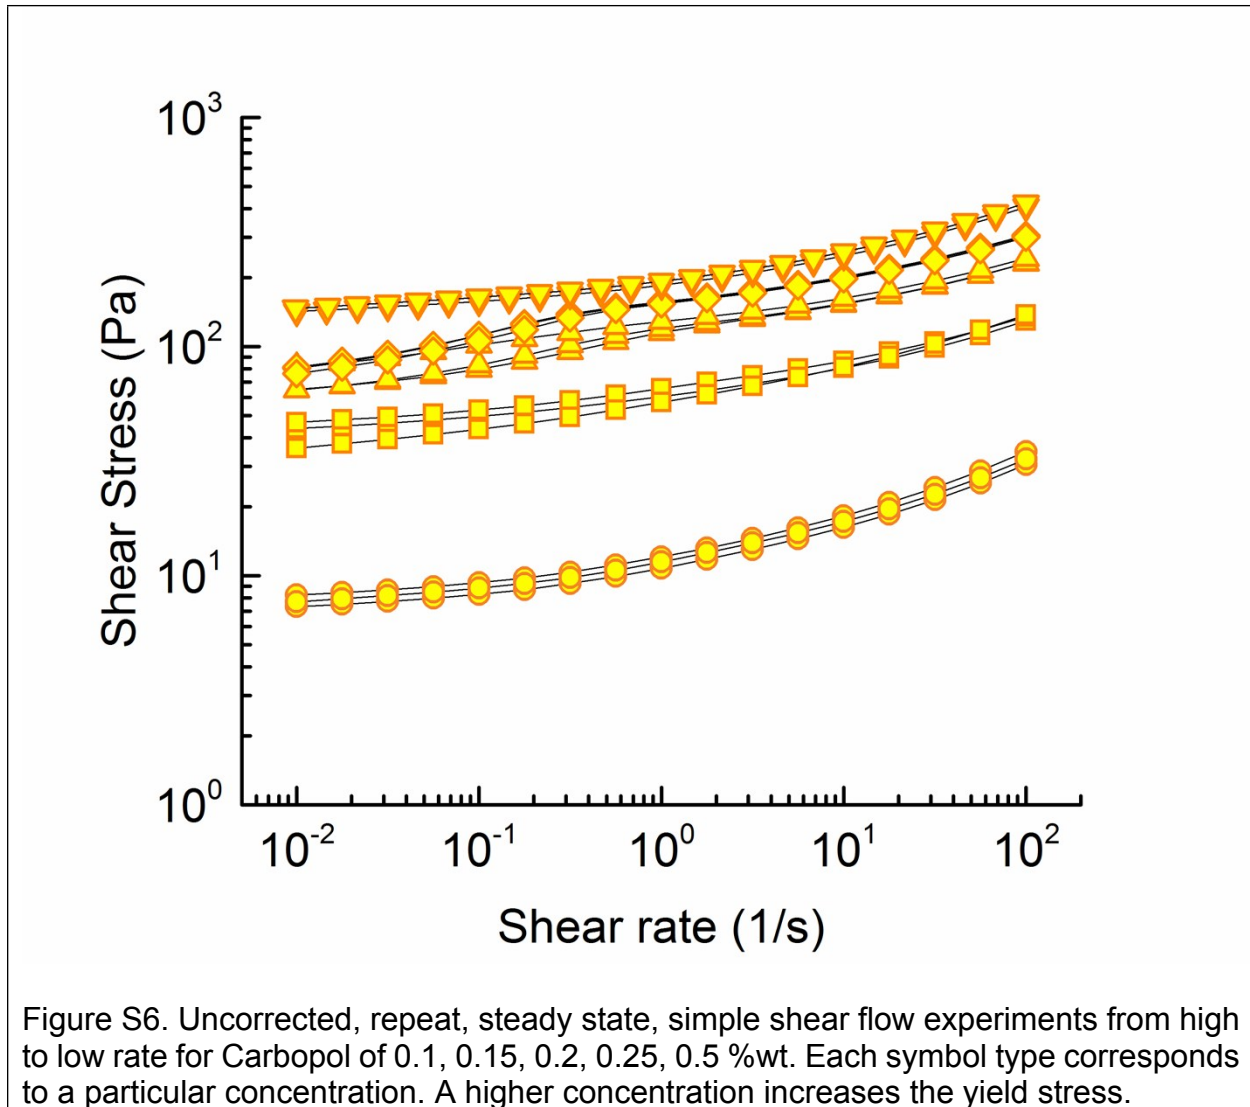

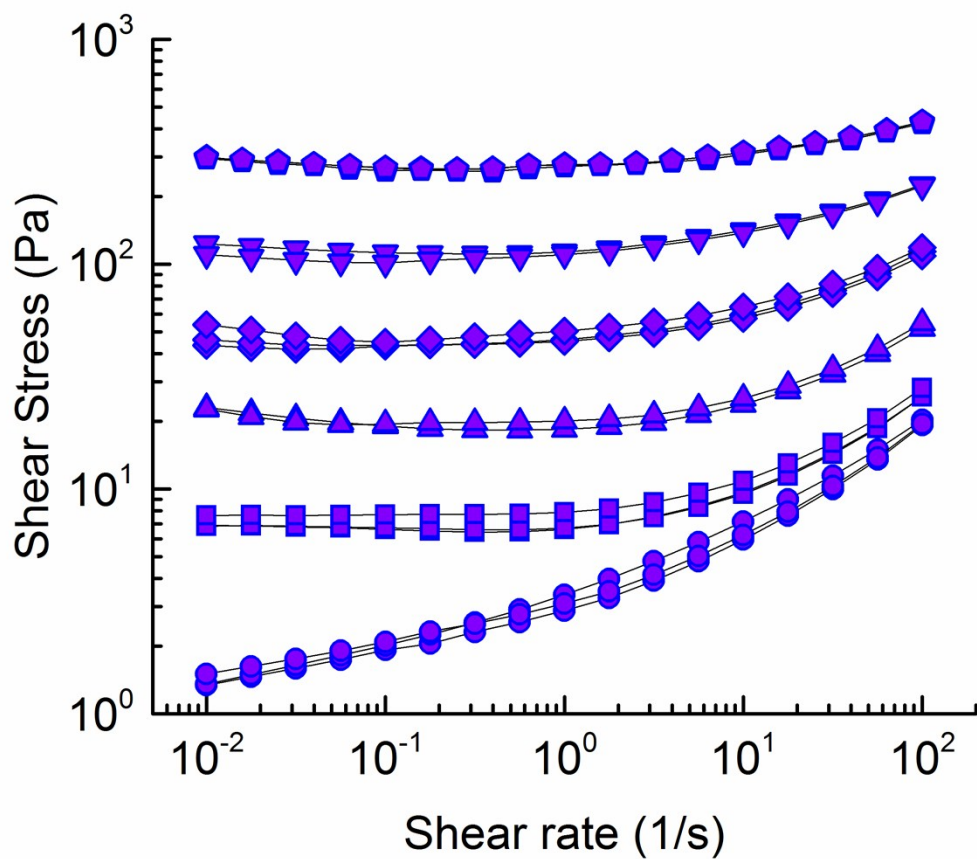

Figure S7. Uncorrected, repeat, steady state, simple shear flow experiments from high to low rate for Bentonite of 7, 8, 9, 10, 11, 12 %wt. Each symbol type corresponds to a particular concentration. A higher concentration increases the yield stress.

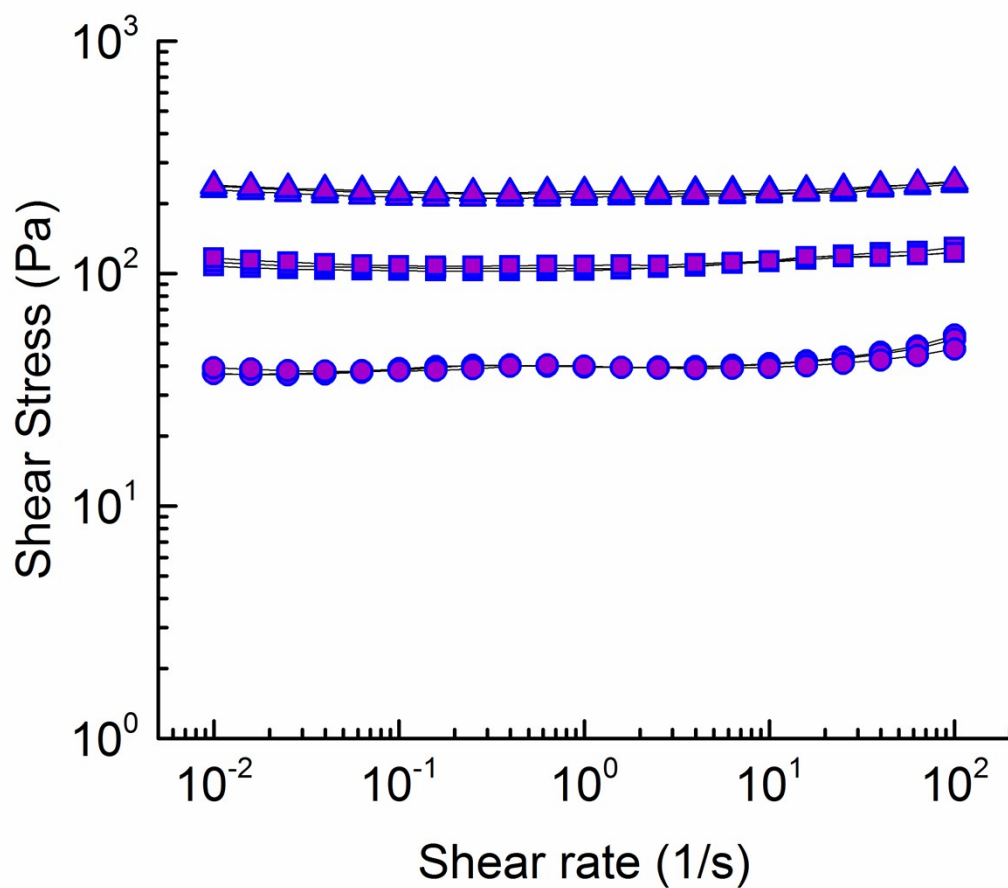

Figure S8. Uncorrected, repeat, steady state, simple shear flow experiments from high to low rate for Laponite of 3, 4, 5 %wt. Each symbol type corresponds to a particular concentration. A higher concentration increases the yield stress.



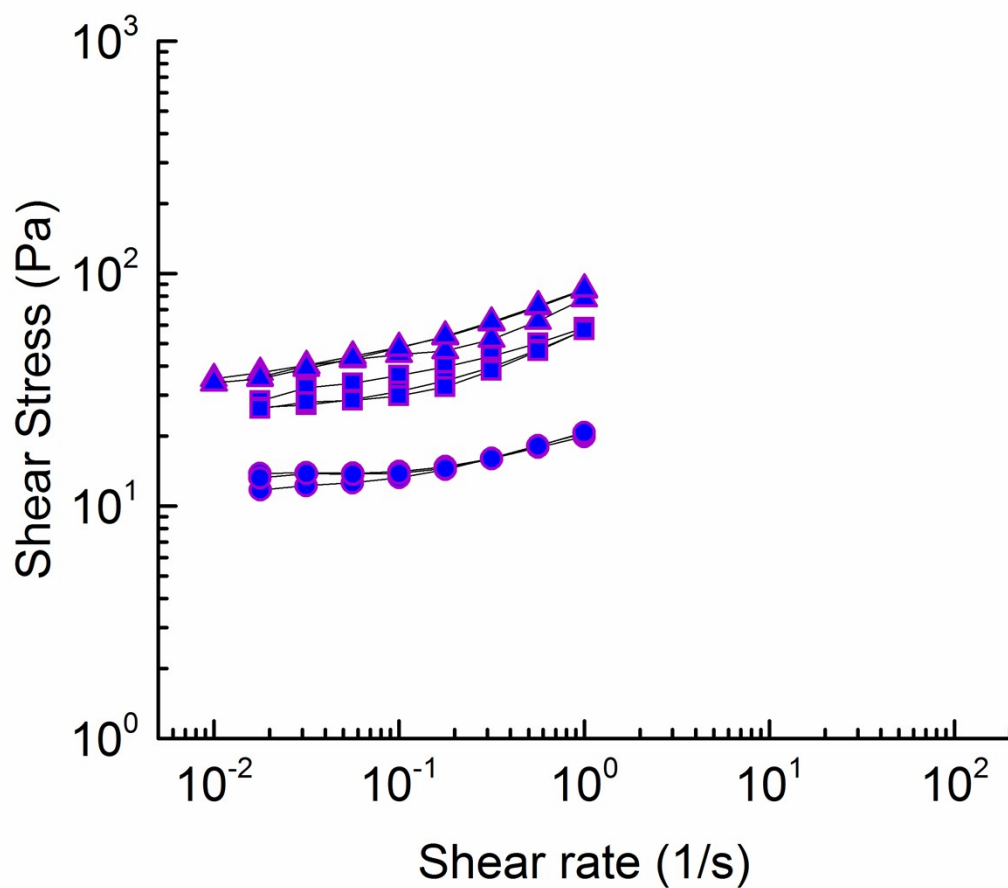

Figure S9. Uncorrected, repeat, steady state, simple shear flow experiments from low to high rate for Xanthan Gum of 2, 4, 5 %wt. Each symbol type corresponds to a particular concentration. A higher concentration increases the yield stress.

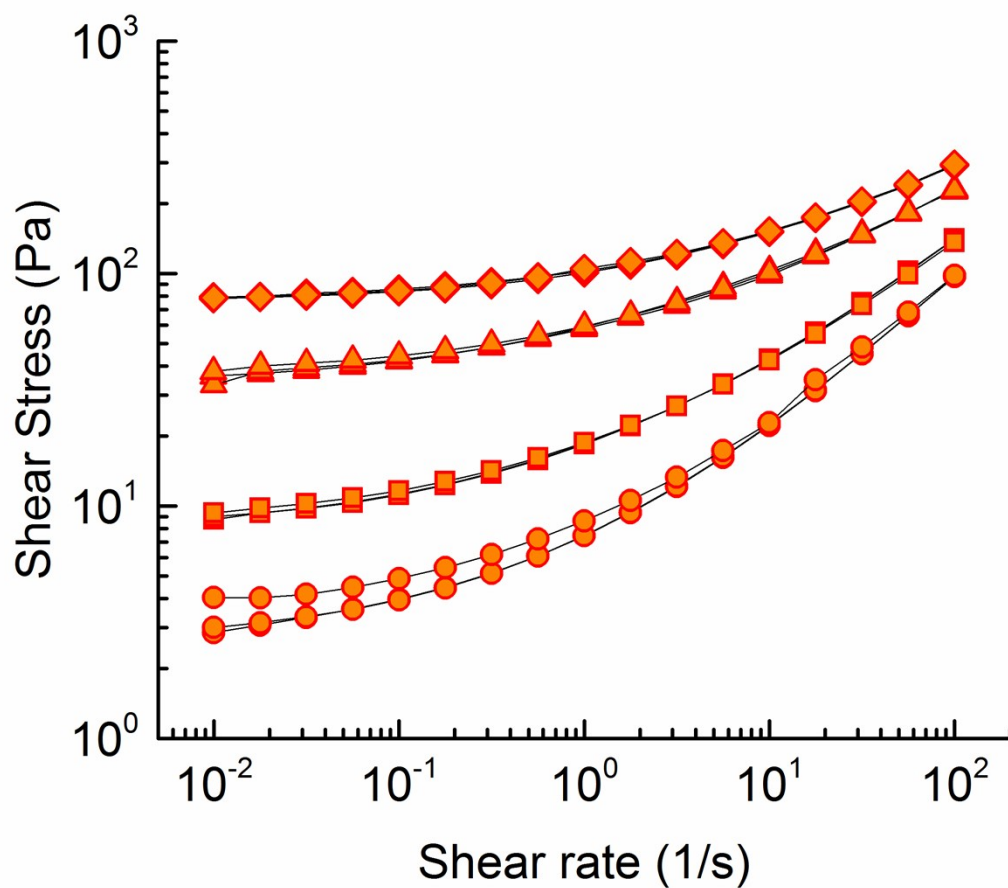

Figure S10. Uncorrected, repeat, steady state, simple shear flow experiments from high to low rate for silicone oil-in-water emulsions of 65, 70, 75, 80 %wt oil. Each symbol type corresponds to a particular concentration. A higher concentration increases the yield stress.

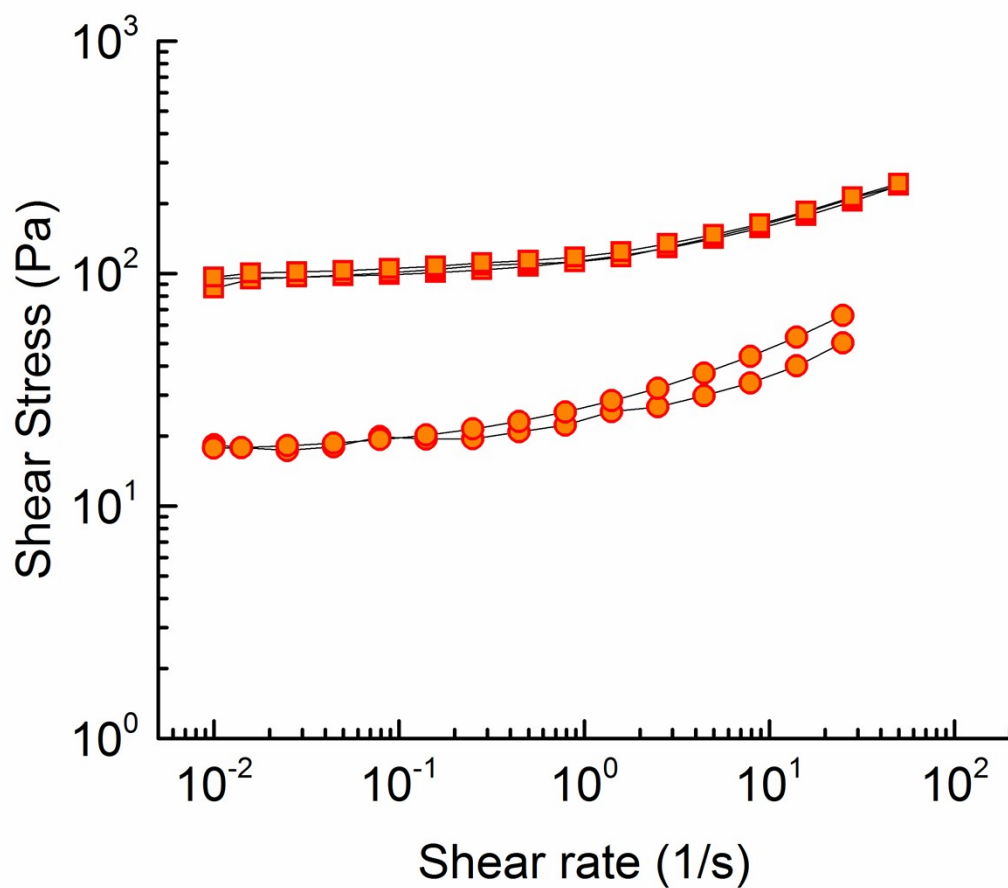

Figure S11. Uncorrected, repeat, steady state, simple shear flow experiments from high to low rate for mineral oil-in-water emulsions of 65, 75 %wt oil. Each symbol type corresponds to a particular concentration. A higher concentration increases the yield stress.

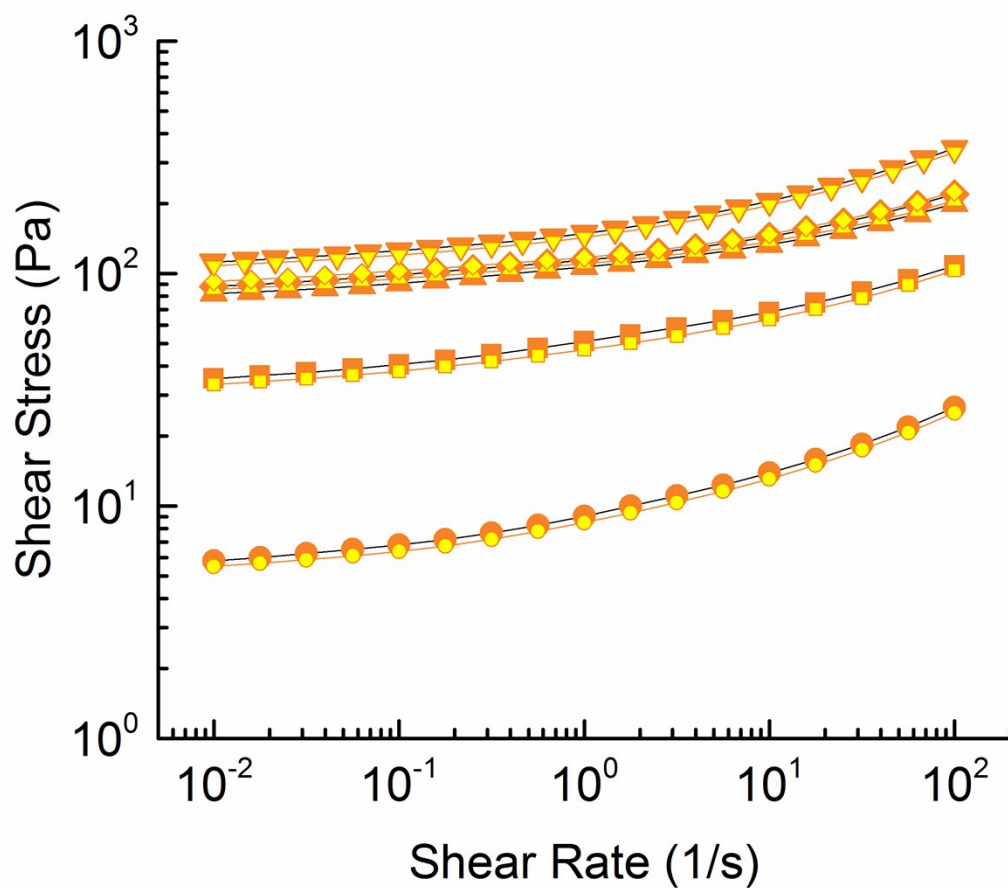

Figure S12. Corrected, steady state, simple shear flow experiments from high to low rate for Carbopol of 0.1, 0.15, 0.2, 0.25, 0.5 %wt at different gap heights. The small yellow symbols are for a gap of 1000 $\mu\text{m}$ , the large orange symbols are for a gap of 500 $\mu\text{m}$ . Each symbol type corresponds to a particular concentration. A higher concentration increases the yield stress.

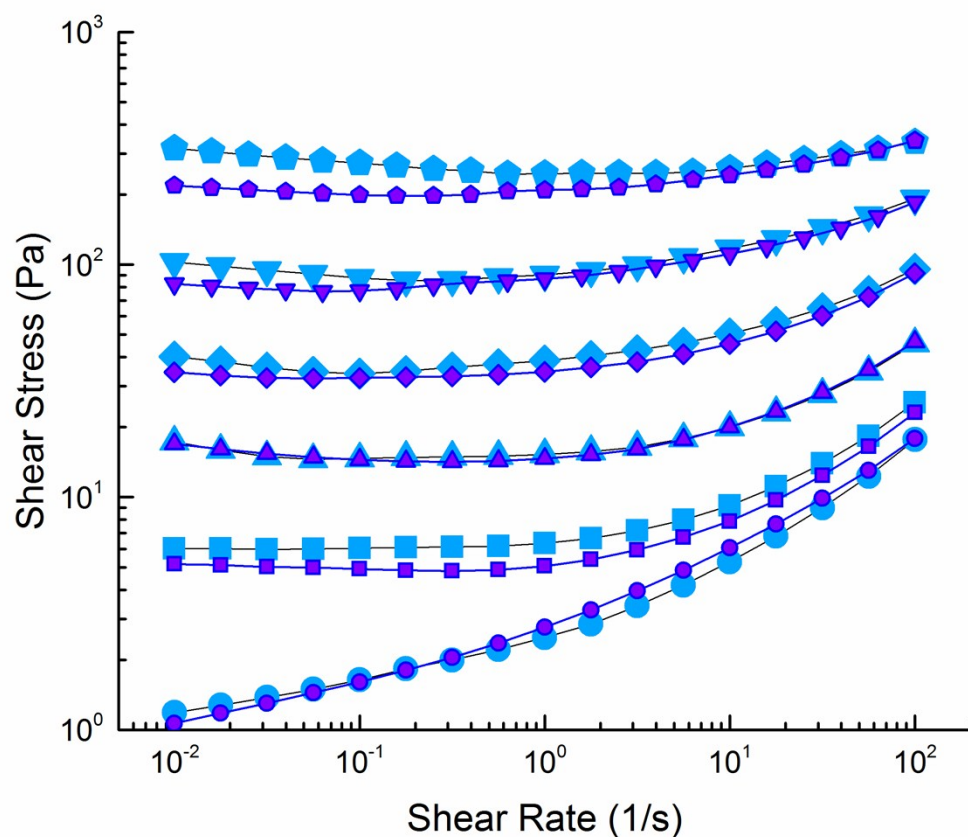

Figure S13. Corrected, steady state, simple shear flow experiments from high to low rate for Bentonite of 7, 8, 9, 10, 11, 12 %wt at different gap heights. The small purple symbols are for a gap of 1000 $\mu\text{m}$ , the large blue symbols are for a gap of 500 $\mu\text{m}$ . Each symbol type corresponds to a particular concentration. A higher concentration increases the yield stress.

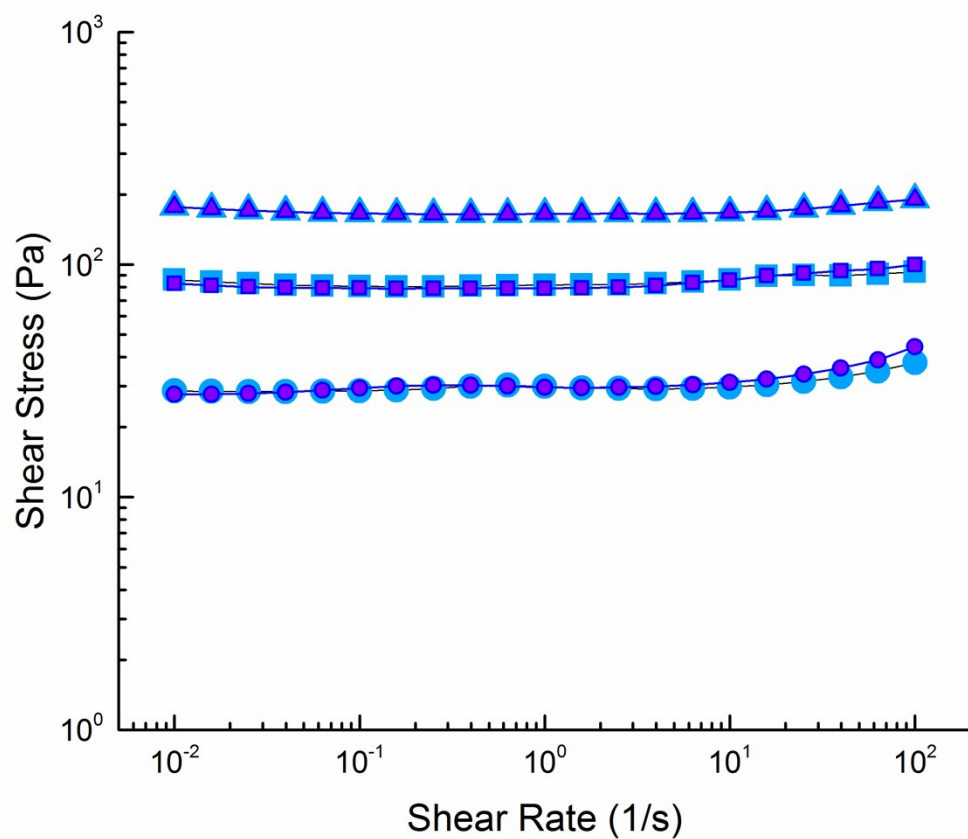

Figure S14. Corrected, steady state, simple shear flow experiments from high to low rate for Laponite of 3, 4, 5 %wt at different gap heights. The small purple symbols are for a gap of 1000 $\mu\text{m}$ , the large blue symbols are for a gap of 500 $\mu\text{m}$ . Each symbol type corresponds to a particular concentration. A higher concentration increases the yield stress.

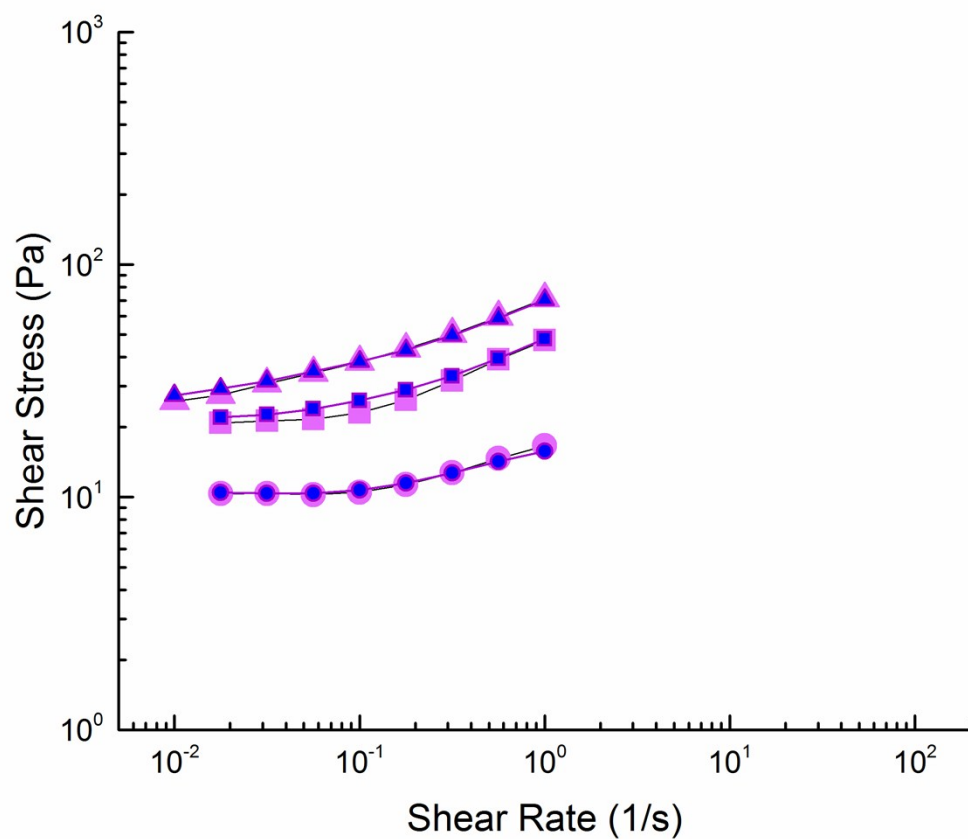

Figure S15. Corrected, steady state, simple shear flow experiments from low to high rate for Xanthan Gum at 2, 4, 5 %wt at different gap heights. The small blue symbols are for a gap of 1000 $\mu\text{m}$ , the large magenta symbols are for a gap of 500 $\mu\text{m}$ . Each symbol type corresponds to a particular concentration. A higher concentration increases the yield stress.

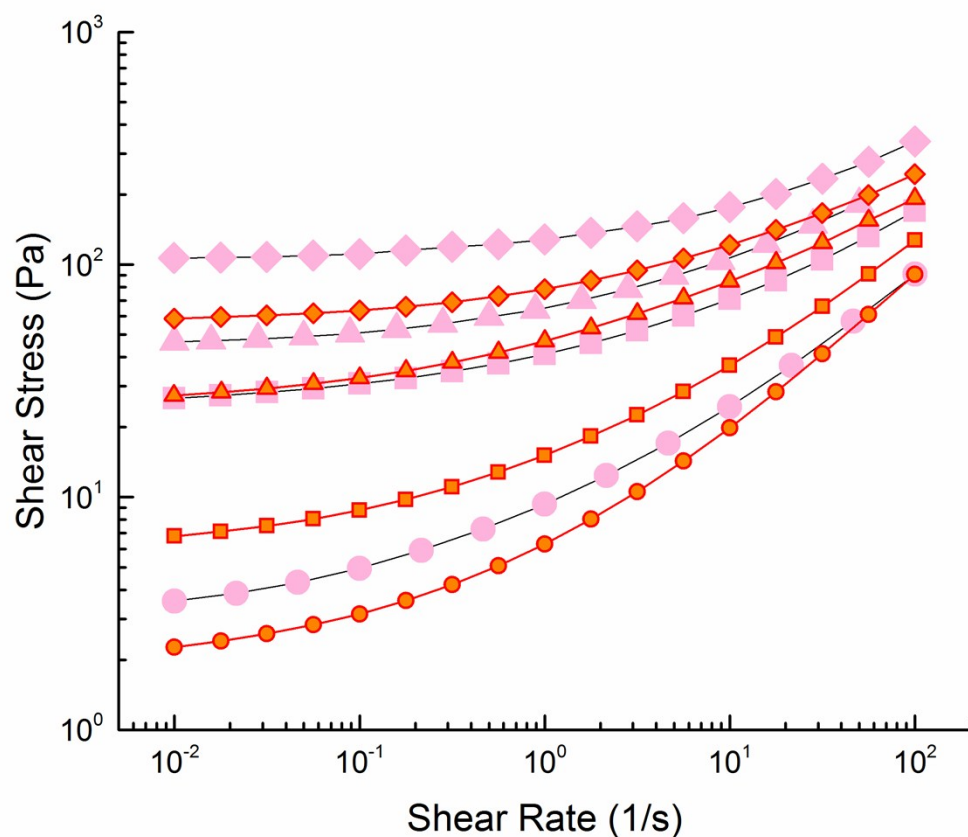

Figure S16. Corrected, steady state, simple shear flow experiments from high to low rate for silicone oil-in-water emulsions of 65, 70, 75, 80 %wt at different gap heights. The small orange symbols are for a gap of 1000 $\mu\text{m}$ , the large pink symbols are for a gap of 500 $\mu\text{m}$ . Each symbol type corresponds to a particular concentration. A higher concentration increases the yield stress. Higher stresses at the smaller gap indicate a confinement effect.



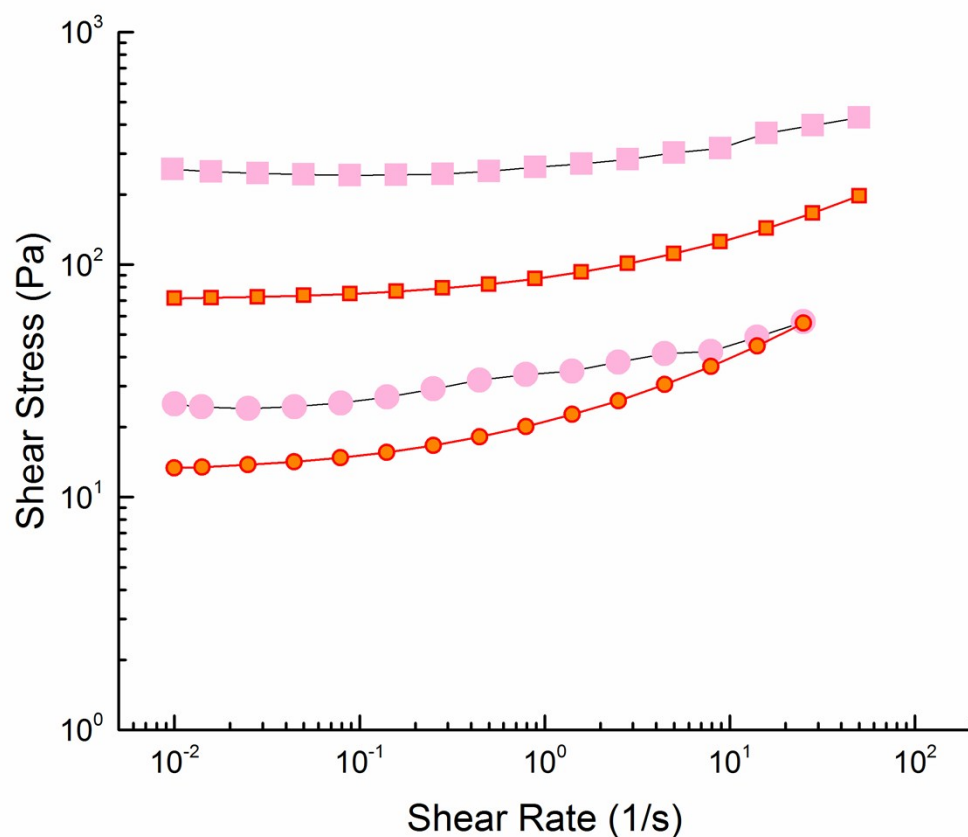

Figure S17. Corrected, steady state, simple shear flow experiments from high to low rate for mineral oil-in-water emulsions of 65, 75 %wt at different gap heights. The small orange symbols are for a gap of 1000 $\mu$ m, the large pink symbols are for a gap of 500 $\mu$ m. Each symbol type corresponds to a particular concentration. A higher concentration increases the yield stress. Higher stresses at the smaller gap indicate a confinement effect.

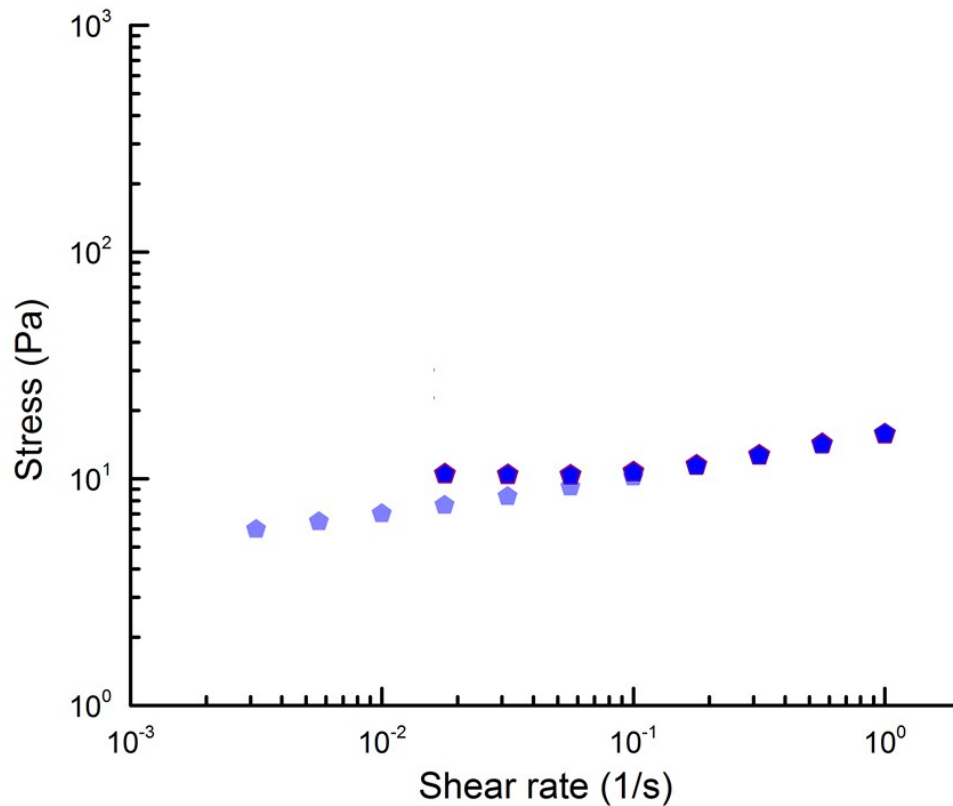

Figure S18. Corrected, steady state, simple shear flow experiments for Xanthan Gum at 2 %wt. For Xanthan Gum formulations, all tests were from low to high shear rate, and so the low-rate plateaus indicate the *static* yield stress. High-to-low tests indicated by the transparent curve did not show a clear yield-stress plateau on experimental timescales.

## SVII. Reference-shear-rate representation

This section discusses a more limited representation of a material's flow behavior. Depending on one's design constraints, one representational comparison might be more or less useful than another. For example, if one knows that their final design will be restricted to a particular shear rate and they are unconcerned with any other aspect of the flow behavior, then it would be most useful to the 'reference shear rate' representation

described in Section III.C Figure 8 (for each formulation at three different shear rates shown in Figure S24), rather than full-curve representations which would add needless complexity. Within Figure S24, the particular shear rate of an application design will further dictate the usefulness of such a comparison. As seen in Figure S24A, at the lowest shear rate of  $0.01 \text{ s}^{-1}$ , materials are not differentiated in any way as they all have yet to deviate significantly from the yield stress value; in terms of this shear-rate design constraint, any choice of material is as good as any other choice, however this is not the case for the other, higher shear rates.

For the higher reference shear rates (Figure S24B-C), we begin to see differentiating

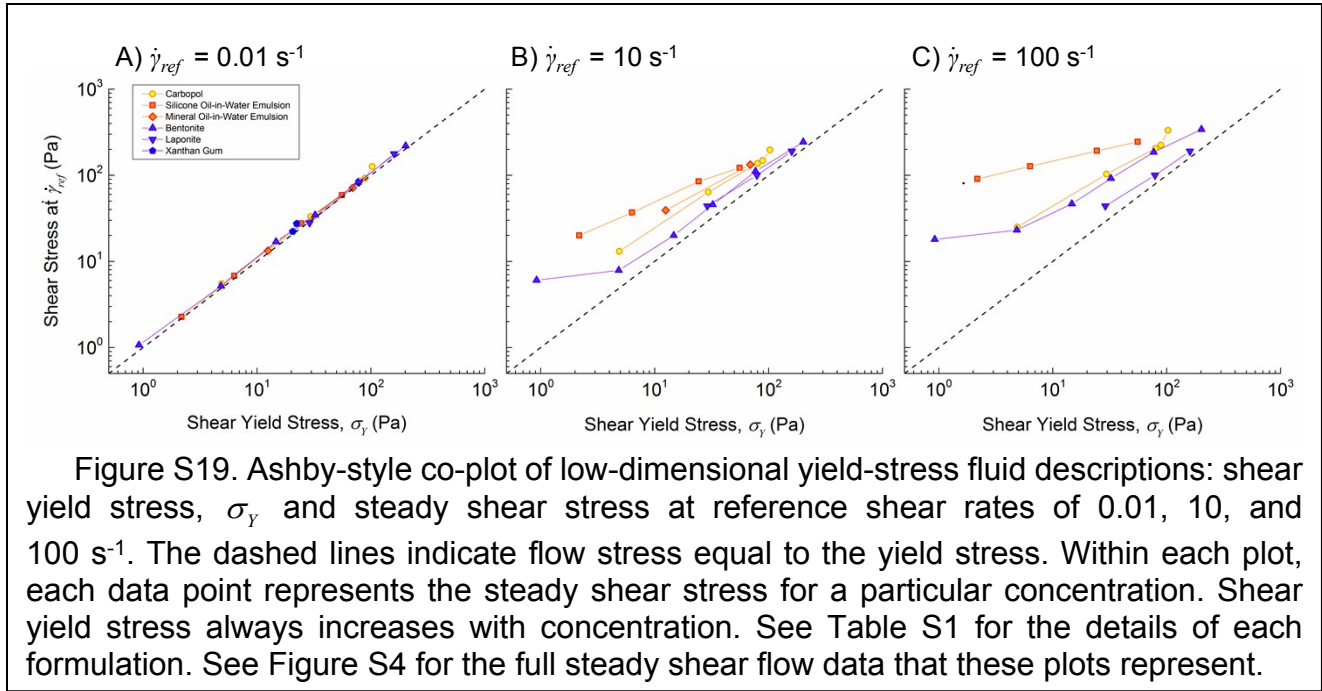

behavior of the flow stress based on the classification tree of design strategies. This differentiation is most clear in Figure S24B where the oil-in-water emulsions and Carbopol (material systems where the yield-stress comes about due to jamming) have higher flow stresses than either of the two particulate gel samples. In Figure S24C, at the highest measured shear rate it is notable that while all other materials, including Bentonite, have an increased stress from the yield value, the shear stress of the other particulate gel, Laponite, still has not increased appreciably. This effect can also be seen in Figure S4, where Laponite has a much flatter flow curve than the other materials. This differentiating behavior of Laponite and Bentonite also manifests itself in the other low-dimensional representations.

## Supplementary Information References

- [1] R.G. Larson, *The Structure and Rheology of Complex Fluids*, Oxford University Press, New York, NY, 1999.
- [2] R. Pal, Rheology of polymer-thickened emulsions, *J. Rheol.* (N. Y. N. Y). 36 (1992) 1245. doi:10.1122/1.550310.
- [3] Y. Otsubo, R.K. Prud'homme, Rheology of oil-in-water emulsions, *Rheol. Acta.* 33 (1994) 29–37. doi:10.1007/BF00453461.
- [4] T.G. Mason, J. Bibette, D.A. Weitz, Yielding and Flow of Monodisperse Emulsions, *J. Colloid Interface Sci.* 179 (1996) 439–448. doi:10.1006/jcis.1996.0235.
- [5] Y. Takahashi, Experimental tests of the scaling relation for textured materials in mixtures of two immiscible fluids, *J. Rheol.* (N. Y. N. Y). 38 (1994) 699. doi:10.1122/1.550481.
- [6] D.A. Weitz, J.S. Huang, Self-similar structures and the kinetic of aggregation of gold colloids, in: *Kinet. Aggreg. Gelation*, Elsevier, 1984: pp. 19–28. doi:10.1016/B978-0-444-86912-8.50010-9.
- [7] C. Clasen, B.P. Gearing, G.H. McKinley, The flexure-based microgap rheometer (FMR), *J. Rheol.* (N. Y. N. Y). 50 (2006) 883. doi:10.1122/1.2357190.
- [8] A. Burmistrova, R. von Klitzing, Control of number density and swelling/shrinking behavior of P(NIPAM–AAc) particles at solid surfaces, *J. Mater. Chem.* 20 (2010) 3502. doi:10.1039/b923969c.
- [9] M. Le Merrer, R. Lespiat, R. Höhler, S. Cohen-Addad, Linear and non-linear wall friction of wet foams, *Soft Matter.* 11 (2015) 368–381. doi:10.1039/C4SM01557F.
- [10] R. Pal, Effect of droplet size on the rheology of emulsions, *AIChE J.* 42 (1996)

3181–3190. doi:10.1002/aic.690421119.

- [11] Y.D. Liu, H.J. Choi, Electrorheological fluids: smart soft matter and characteristics, *Soft Matter*. 8 (2012) 11961. doi:10.1039/c2sm26179k.
- [12] H. Dubberly, *How do you design? A Compendium of Models*, Dubberly Design Office, 2008.
- [13] K. Ulrich, S.D. Eppinger, *Product design and development*, 5th ed., McGraw-Hill, New York, 2012. <http://www.worldcat.org/title/product-design-and-development/oclc/791505360?referer=br&ht=edition> (accessed September 26, 2012).
- [14] D.L. McDowell, J.H. Panchal, H.-J. Choi, C.C. Seepersad, J.K. Allen, F. Mistree, Decision Making in Engineering Design, in: *Integr. Des. Multiscale, Multifunct. Mater. Prod.*, Elsevier, 2010: pp. 65–85. doi:10.1016/B978-1-85617-662-0.00004-1.
- [15] C.C. Seepersad, R.S. Kumar, J.K. Allen, F. Mistree, D.L. McDowell, Multifunctional design of prismatic cellular materials, in: *J. Comput. Mater. Des.*, 2005: pp. 163–181. doi:10.1007/s10820-005-3167-0.
- [16] N.A. Lynd, F.T. Oyerokun, D.L. O'Donoghue, D.L. Handlin, G.H. Fredrickson, Design of soft and strong thermoplastic elastomers based on nonlinear block copolymer architectures using self-consistent-field theory, *Macromolecules*. 43 (2010) 3479–3486. doi:10.1021/ma902517v.
- [17] J. Hirtz, R. Stone, D. McAdams, S. Szykman, K. Wood, A functional basis for engineering design: Reconciling and evolving previous efforts, *Res. Eng. Des.* 13 (2002) 65–82. doi:10.1007/s00163-001-0008-3.

- [18] A. Winter, V. Govindarajan, Engineering Reverse Innovations, *Harv. Bus. Rev.* 93 (2015) 80–89.
- [19] G. Pahl, W. Beitz, *Engineering Design - A Systematic Approach*, Springer London, London, 1996. doi:10.1007/978-1-4471-3581-4.
- [20] J.S. Linsey, I. Tseng, K. Fu, J. Cagan, K.L. Wood, C. Schunn, A Study of Design Fixation, Its Mitigation and Perception in Engineering Design Faculty, *J. Mech. Des.* 132 (2010) 41003. doi:10.1115/1.4001110.
- [21] E. de Bono, *Lateral Thinking*, Penguin Books, New York, NY, 1977.
- [22] M.P. Groover, *Fundamentals of Modern Manufacturing: materials, processes and systems*, (2010) 1025.
- [23] R. Norton, *Machine Design*, 5th ed., Pearson, 2013.
- [24] R. Budynas, K. Nisbett, *Shigley's Mechanical Engineering Design*, 10th ed., McGraw-Hill Education, 2014.
- [25] B.M. Kudrowitz, D. Wallace, Assessing the quality of ideas from prolific, early-stage product ideation, *J. Eng. Des.* (2012) 1–20. doi:10.1080/09544828.2012.676633.
- [26] Q. Barral, G. Ovarlez, X. Chateau, J. Boujlel, B. Rabideau, P. Coussot, Adhesion of yield stress fluids, *Soft Matter*. (2010) 1343–1351. doi:10.1039/b922162j.
- [27] R.H. Ewoldt, P. Tourkine, G.H. McKinley, A.E. Hosoi, Controllable adhesion using field-activated fluids, *Phys. Fluids*. 23 (2011). doi:10.1063/1.3608277.
- [28] D. Derks, A. Lindner, C. Creton, D. Bonn, Cohesive failure of thin layers of soft model adhesives under tension, *J. Appl. Phys.* 93 (2003) 1557–1566. doi:10.1063/1.1533095.
- [29] J.M. Piau, Carbopol gels: Elastoviscoplastic and slippery glasses made of individual

- swollen sponges Meso- and macroscopic properties, constitutive equations and scaling laws, *J. Nonnewton. Fluid Mech.* 144 (2007) 1–29. doi:10.1016/j.jnnfm.2007.02.011.
- [30] P. Møller, A. Fall, V. Chikkadi, D. Derks, D. Bonn, An attempt to categorize yield stress fluid behaviour., *Philos. Trans. A. Math. Phys. Eng. Sci.* 367 (2009) 5139–5155. doi:10.1098/rsta.2009.0194.
- [31] Y.M. Joshi, Model for cage formation in colloidal suspension of laponite, *J. Chem. Phys.* 127 (2007). doi:10.1063/1.2779026.
- [32] W.E. Rochefort, S. Middleman, Rheology of Xanthan Gum: Salt, Temperature, and Strain Effects in Oscillatory and Steady Shear Experiments, *J. Rheol. (N. Y. N. Y.)* 31 (1987) 337. doi:10.1122/1.549953.
- [33] R.H. Ewoldt, M.T. Johnston, L.M. Caretta, Experimental challenges of shear rheology with case studies in biological complex fluids, in: S.E. Spagnolie (Ed.), *Complex Fluids Biol. Syst.*, Springer, 2015: pp. 207–241. doi:10.1007/978-1-4939-2065-5\_6.
- [34] C.W. Macosko, *Rheology Principles, Measurements, and Applications*, Wiley, New York, 1994.
- [35] P. Coussot, Q.D. Nguyen, H.T. Huynh, D. Bonn, Viscosity bifurcation in thixotropic, yielding fluids, *J. Rheol. (N. Y. N. Y.)* 46 (2002) 573–589. doi:10.1122/1.1459447.
- [36] H. Emady, M. Caggioni, P. Spicer, Colloidal microstructure effects on particle sedimentation in yield stress fluids, *J. Rheol.* 57 (2013) 1761–1772. doi:10.1122/1.4824471.
- [37] R.H. Ewoldt, C. Clasen, a. E. Hosoi, G.H. McKinley, Rheological fingerprinting of



gastropod pedal mucus and synthetic complex fluids for biomimicking adhesive locomotion, *Soft Matter*. 3 (2007) 634. doi:10.1039/b615546d.

[38] B.C. Blackwell, M.E. Deetjen, J.E. Gaudio, R.H. Ewoldt, Sticking and splashing in yield-stress fluid drop impacts on coated surfaces, *Phys. Fluids*. 27 (2015) 43101. doi:10.1063/1.4916620.

[39] B.C. Blackwell, M.E. Deetjen, J.E. Gaudio, R.H. Ewoldt, Quantitative measures of yield-stress fluid drop impacts on coated surfaces, *J. Nonnewton. Fluid Mech.* (2016).
