# Supplementary material for: Design of yield-stress fluids: a rheology-to-structure inverse problem
Source: Royal Society of Chemistry journal article supplement (doi:10.1039/c7sm00758b), 2017-01-01
Supplement: c7sm00758b2.csv [file c7sm00758b2.csv]

Carbopol_0.1	Carbopol_0.1	Carbopol_0.15	Carbopol_0.15	Carbopol_0.2	Carbopol_0.2	Carbopol_0.25	Carbopol_0.25	Carbopol_0.5	Carbopol_0.5	Bentonite_7	Bentonite_7	Bentonite_8	Bentonite_8	Bentonite_9	Bentonite_9	Bentonite_10	Bentonite_10	Bentonite_11	Bentonite_11	Bentonite_12	Bentonite_12	Laponite_3	Laponite_3	Laponite_4	Laponite_4	Laponite_5	Laponite_5	XanthanGum_2	XanthanGum_2	XanthanGum_4	XanthanGum_4	XanthanGum_5	XanthanGum_5	SiliconeOilEmulsion_65	SiliconeOilEmulsion_65	SiliconeOilEmulsion_70	SiliconeOilEmulsion_70	SiliconeOilEmulsion_75	SiliconeOilEmulsion_75	SiliconeOilEmulsion_80	SiliconeOilEmulsion_80	MineralOilEmulsion_65	MineralOilEmulsion_65	MineralOilEmulsion_75	MineralOilEmulsion_75
Stress [Pa]	Shear rate [1/s]	Stress [Pa]	Shear rate [1/s]	Stress [Pa]	Shear rate [1/s]	Stress [Pa]	Shear rate [1/s]	Stress [Pa]	Shear rate [1/s]	Stress [Pa]	Shear rate [1/s]	Stress [Pa]	Shear rate [1/s]	Stress [Pa]	Shear rate [1/s]	Stress [Pa]	Shear rate [1/s]	Stress [Pa]	Shear rate [1/s]	Stress [Pa]	Shear rate [1/s]	Stress [Pa]	Shear rate [1/s]	Stress [Pa]	Shear rate [1/s]	Stress [Pa]	Shear rate [1/s]	Stress [Pa]	Shear rate [1/s]	Stress [Pa]	Shear rate [1/s]	Stress [Pa]	Shear rate [1/s]	Stress [Pa]	Shear rate [1/s]	Stress [Pa]	Shear rate [1/s]	Stress [Pa]	Shear rate [1/s]	Stress [Pa]	Shear rate [1/s]	Stress [Pa]	Shear rate [1/s]	Stress [Pa]	Shear rate [1/s]
25.13789	100	103.24299	99.9932	205.351	99.9985	224.603	99.9985	331.66157	100	17.91403	99.9969	23.0927	99.999	46.60439	100.002	91.85687	100.003	185.47853	100.003	340.80954	100.003	44.21881	100.001	100.00257	100.001	190.32285	100.001	10.48444	0.01779	22.05883	0.01779	27.406	0.01	90.61711	100.002	127.09274	99.999	192.17814	100.002	244.62984	99.9982	55.99259	25.0002	197.18662	50.0013
20.71739	56.2342	89.22201	56.2314	185.741	63.0955	202.587	63.0955	299.17589	68.1293	13.05709	56.2319	16.48958	56.2342	35.32991	56.2352	72.73365	56.2352	160.79834	63.0953	309.97263	63.0982	38.91857	63.0957	95.78932	63.0957	185.31988	63.0957	10.40565	0.03162	22.6262	0.03163	29.26346	0.01779	60.91228	56.235	90.9772	56.2335	154.74028	56.2353	199.48006	56.2329	44.63139	14.0586	166.33656	28.1178
17.4555	31.6235	78.45907	31.6211	169.91	39.8107	184.706	39.8107	271.62963	46.4159	9.89228	31.6228	12.41333	31.6231	28.20285	31.6231	60.36183	31.6234	143.42031	39.8111	287.51195	39.8123	35.9068	39.8099	94.05953	39.8099	178.77445	39.8099	10.37495	0.05625	23.97302	0.05624	31.54633	0.03162	41.30129	31.6232	66.01423	31.6225	124.11677	31.6231	166.40653	31.622	36.43286	7.90575	142.97775	15.8118
14.99002	17.7826	70.09424	17.7818	156.873	25.1189	169.981	25.1189	248.20501	31.6228	7.67002	17.7824	9.71454	17.783	23.35811	17.7828	51.77047	17.7837	130.08232	25.1191	269.68723	25.1196	33.77452	25.1186	91.64897	25.1186	173.51516	25.1186	10.71681	0.10001	26.01193	0.1	34.78367	0.05623	28.36891	17.7831	48.77655	17.7825	101.73994	17.7831	141.17103	17.7823	30.48387	4.44572	125.07362	8.89157
13.08067	9.99975	63.48758	9.99985	146.078	15.8489	157.777	15.8489	228.2686	21.5444	6.05118	10.0001	7.88122	10.0002	20.00143	9.99971	45.63459	10.0001	119.48727	15.8493	255.11327	15.8497	32.21294	15.8494	89.44618	15.8494	169.18085	15.8494	11.48285	0.17783	28.92955	0.17783	38.24749	0.1	19.8779	10.0001	36.84086	9.99987	84.76016	10.0002	121.54496	9.99976	25.96623	2.50003	111.44641	5.00008
11.57317	5.62331	58.1719	5.62324	137.079	9.99999	147.637	9.99999	211.23199	14.678	4.85386	5.62336	6.73081	5.62351	17.68293	5.62329	41.26449	5.62359	110.94298	10.0002	242.71116	9.99993	31.0958	9.9998	85.59149	9.9998	167.32259	9.9998	12.70151	0.31623	33.16518	0.31623	42.82953	0.17783	14.29552	5.62348	28.48297	5.62335	71.66092	5.6235	106.29903	5.62327	22.71102	1.40585	100.86642	2.81177
10.35465	3.16229	53.80722	3.16198	129.66	6.30956	139.193	6.30956	196.64316	10	3.95803	3.16222	5.9283	3.16235	16.10637	3.16218	38.21541	3.16228	104.08448	6.30981	231.49298	6.30976	30.35042	6.30957	83.66931	6.30957	165.95727	6.30957	14.25849	0.56235	39.49479	0.56236	49.68257	0.31623	10.55935	3.16235	22.55729	3.16223	61.39981	3.1623	94.56746	3.16221	20.10025	0.79057	92.93609	1.58118
9.33068	1.77833	50.16318	1.77822	123.4	3.98107	132.124	3.98107	184.12492	6.81292	3.2772	1.77823	5.39446	1.77825	15.21088	1.77827	36.11054	1.77832	98.35115	3.98118	221.61706	3.98115	29.88756	3.98102	81.16621	3.98102	165.56416	3.98102	15.74646	1.00001	48.00806	1.00001	58.86048	0.56234	8.03571	1.77831	18.28545	1.77825	53.33421	1.77832	85.48217	1.77825	18.15953	0.44458	86.81765	0.88917
8.48094	0.99999	47.00957	0.99995	118.23	2.51187	126.175	2.51187	173.34593	4.64159	2.76124	1	5.0567	1	14.63278	0.99999	34.57004	1	93.33092	2.51186	214.44996	2.51195	29.62551	2.51191	79.84406	2.51191	165.69839	2.51191					70.56694	1.00001	6.2968	1.00002	15.13808	0.99999	46.94648	1.00003	78.48243	0.99998	16.69373	0.25	82.35008	0.50001
7.77353	0.56237	44.22162	0.56232	113.653	1.58491	121.321	1.58491	164.15359	3.16228	2.3588	0.56234	4.87586	0.56234	14.3254	0.56235	33.59007	0.56235	89.47134	1.58491	210.9356	1.58491	29.58755	1.58484	79.25426	1.58484	165.47708	1.58484							5.07195	0.56235	12.80973	0.56234	41.90781	0.56235	73.08014	0.56234	15.60403	0.14058	79.13933	0.28118
7.19093	0.31622	41.78499	0.31621	110.153	1	117.018	1	155.89022	2.15444	2.04835	0.31622	4.81499	0.31623	14.21172	0.31622	33.07742	0.31623	86.80706	0.99999	208.97405	1.00001	29.71572	1	79.07131	1	165.28967	1							4.20883	0.31623	11.06961	0.31622	37.94722	0.31623	68.99127	0.31622	14.80254	0.07906	76.64446	0.15812
6.72312	0.17783	39.74573	0.17782	106.841	0.63097	113.673	0.63097	149.22147	1.4678	1.80328	0.17782	4.84142	0.17782	14.25808	0.17783	32.76727	0.17783	85.05992	0.63097	206.77405	0.63094	29.97109	0.63093	79.04249	0.63093	164.70054	0.63093							3.59185	0.17783	9.76585	0.17783	34.9064	0.17783	65.93426	0.17783	14.21707	0.04446	74.8621	0.08892
6.37704	0.1	37.98177	0.1	103.614	0.39811	110.836	0.39811	142.95894	1	1.60665	0.1	4.91553	0.1	14.50427	0.1	32.56787	0.1	83.69476	0.39811	199.81542	0.39811	30.22787	0.3981	79.07317	0.3981	164.45278	0.3981							3.14884	0.1	8.79095	0.1	32.54917	0.1	63.60168	0.1	13.7847	0.025	73.54782	0.05
6.09563	0.05623	36.52444	0.05623	100.497	0.25119	108.104	0.25119	137.5717	0.68129	1.44293	0.05623	4.98187	0.05623	14.84914	0.05624	32.38879	0.05624	81.63179	0.25119	197.62263	0.25119	30.28964	0.25118	79.00207	0.25118	164.65203	0.25118							2.82679	0.05623	8.06252	0.05624	30.72854	0.05623	61.84817	0.05623	13.46353	0.01408	72.60983	0.02812
5.86808	0.03162	35.29356	0.03162	97.6607	0.15849	105.333	0.15849	133.10652	0.46416	1.30242	0.03162	5.01742	0.03162	15.40939	0.03162	32.60481	0.03162	78.74426	0.15849	197.67822	0.15849	29.99347	0.15849	78.88061	0.15849	165.09277	0.15849							2.59032	0.03162	7.52066	0.03162	29.32936	0.03162	60.50045	0.03162	13.3371	0.01	71.93458	0.01582
5.6745	0.01778	34.21106	0.01778	94.9662	0.1	102.751	0.1	129.23245	0.31623	1.17901	0.01778	5.10491	0.01778	16.07252	0.01778	33.4222	0.01778	77.25351	0.1	199.50705	0.10001	29.41359	0.1	79.10256	0.1	165.77106	0.1							2.40575	0.01783	7.1131	0.01781	28.20792	0.0179	59.45702	0.01782			71.56606	0.01001
5.50185	0.01	33.25297	0.01	92.5128	0.06309	100.33	0.06309	125.82794	0.21544	1.06695	0.01	5.16249	0.01	16.92827	0.01	34.44723	0.01	76.57364	0.06308	202.38646	0.06311	28.81411	0.0631	79.26308	0.0631	166.99309	0.0631							2.26137	0.01	6.79915	0.01002	27.33986	0.00995	58.62171	0.00998
				90.3578	0.03981	98.0689	0.03981	122.76174	0.14678									77.91415	0.03981	206.09742	0.03981	28.30953	0.03981	79.52186	0.03981	168.69615	0.03981
				88.4981	0.02512	95.9847	0.02512	120.00091	0.1									79.1035	0.02512	210.05865	0.02512	27.9321	0.02512	80.1693	0.02512	170.96262	0.02512
				86.8739	0.01588	94.1075	0.01588	117.5368	0.06813									80.83069	0.01585	214.11115	0.01585	27.74151	0.01585	81.308	0.01585	173.75618	0.01585
				85.4407	0.00999	92.4316	0.00999	115.30032	0.04642									82.68802	0.01	218.65097	0.01	27.71291	0.01	82.87639	0.01	177.05737	0.01
								113.23206	0.03162
								111.31123	0.02154
								109.51226	0.01461
								107.83386	0.01002
