# Supplementary material for: Design of yield-stress fluids: a rheology-to-structure inverse problem
Source: Royal Society of Chemistry journal article supplement (doi:10.1039/c7sm00758b), 2017-01-01
Supplement: c7sm00758b3.csv [file c7sm00758b3.csv]

Material	wt% Oil	wt% SDS	HB-Sigma_Y	HB-GammaDot_Crit	HB-n	HB-R^2	HB-Sigma_Y-Std Error	HB-GammaDot_Crit-Std Error	HB-n-Std Error	Bingham-Sigma_Y	Bingham-Eta_inf	Bingham-R^2	Bingham-Sigma_Y-Std Error	Bingham-Eta_inf-Std Error
Silicone Oil-in-Water Emulsion	65	11.7	2.18	0.39866	0.05	0.99	0.05	0.03	0.008	2.3	1.2	0.76	0.31	0.16
Silicone Oil-in-Water Emulsion	70	10	6.34	0.58138	0.103	0.99	0.103	0.04	0.007	6.8	1.7	0.67	0.93	0.27
Silicone Oil-in-Water Emulsion	75	8.3	24.4	1.23	0.12	0.99	0.12	0.034	0.002	27	2.2	0.56	3.16	0.42
Silicone Oil-in-Water Emulsion	80	6.7	55.8	7.05	0.09	0.99	0.09	0.07	0.001	58	2.3	0.64	4.19	0.38
Mineral Oil-in-Water Emulsion	65	11.7	12.5	2.13	0.5	0.99	0.04	0.03	0.002	13.4	2.1	0.74	0.9	0.31
Mineral Oil-in-Water Emulsion	75	8.3	69.2	14.02	0.48	0.99	0.17	0.18	0.003	71	2.6	0.79	4.8	0.32
