# Supplementary material for: Design of yield-stress fluids: a rheology-to-structure inverse problem
Source: Royal Society of Chemistry journal article supplement (doi:10.1039/c7sm00758b), 2017-01-01
Supplement: c7sm00758b4.csv [file c7sm00758b4.csv]

Material	wt% Solid Content	HB-Sigma_Y	HB-GammaDot_Crit	HB-n	HB-R^2	HB-Sigma_Y-Std Error	HB-GammaDot_Crit-Std Error	HB-n-Std Error	Bingham-Sigma_Y	Bingham-Eta_inf	Bingham-R^2	Bingham-Sigma_Y-Std Error	Bingham-Eta_inf-Std Error
Carbopol	0.1	4.9	2.48	0.37	0.99	0.05	0.17	0.004	5.5	0.25	0.49	0.5	0.05
Carbopol	0.15	29.6	6.01	0.31	0.99	0.43	0.007	0.007	33.1	1	0.39	2.73	0.19
Carbopol	0.2	80	26.26	0.31	0.99	1.17	2.69	0.01	85.44	1.2	0.43	6.33	0.22
Carbopol	0.25	89	30.66	0.33	0.99	1.04	2.33	0.01	92	1.5	0.39	4.98	0.31
Carbopol	0.5	103	12.74	0.37	0.99	0.53	0.41	0.003	108	3	0.49	6.12	0.46
Bentonite	7	0.92	0.23	0.46	0.99	0.04	0.05	0.01	1	0.23	0.52	0.19	0.05
Bentonite	8	4.84	18.9	0.81	0.98	0.06	1.15	0.03	4.8	0.2	0.95	0.1	0.01
Bentonite	9	14.7	37.6	0.83	0.95	0.3	3.4	0.07	14.2	0.35	0.91	0.35	0.03
Bentonite	10	32.4	40.05	0.67	0.99	0.27	1.63	0.02	32.4	0.67	0.89	0.78	0.06
Bentonite	11	76.9	51.67	0.51	0.99	0.82	2.87	0.02	76	1.3	0.72	2.52	0.16
Bentonite	12	202	174	0.6	0.95	2.47	21.35	0.06	197	1.6	0.72	3.88	0.2
Laponite	3	29	230	0.8	0.95	0.22	32	0.08	29	0.16	0.94	0.2	0.009
Laponite	4	79	862	0.58	0.92	0.69	318	0.08	80	0.24	0.84	0.58	0.02
Laponite	5	160	1509	0.6	0.98	2.56	610	0.11	165	0.278	0.96	1	0.02
Xanthan Gum	2	9.9	1.89894	0.75	0.97	0.32	0.22	0.13	10.3	6	0.96	0.16	0.48
Xanthan Gum	4	20.6	0.65	0.71	0.99	0.36	0.04	0.04	22	28	0.96	0.48	1.92
Xanthan Gum	5	22.3	0.20248	0.48	0.99	0.47	0.02	0.01	27.4	42.6	0.82	2.67	6.64
